# Supplementary material for: Risk of atrial fibrillation in athletes: a systematic review and meta-analysis
Source: HighWire-hosted journal article supplement (doi:10.1136/bjsports-2021-103994), 2021-07-12
Supplement: bjsports-2021-103994supp001_data_supplement.pdf [file bjsports-2021-103994supp001_data_supplement.pdf]

**Sporting Activity and the Risk of Atrial Fibrillation in Athletes: A Systematic Review and Meta-Analysis.**

Newman, W<sup>1</sup>., Parry-Williams, G<sup>2</sup>., Wiles, J.D<sup>1</sup>., Edwards, J.J<sup>1</sup>., Hulbert, S<sup>3</sup>., Kipourou, K<sup>4</sup>., Papadakis, M<sup>2</sup>., Sharma, R<sup>4</sup>, O'Driscoll, J.M.<sup>1,4</sup>

<sup>1</sup>School of Human and Life Sciences, Canterbury Christ Church University, Kent, CT1 1QU

<sup>2</sup>Cardiology Clinical Academic Group, St George's University of London, London, UK.

<sup>3</sup>School of Psychology, Politics and Sociology, Canterbury Christ Church University, Kent, CT1 1QU

<sup>4</sup>Department of Cardiology, St George's Healthcare NHS Trust, Blackshaw Road, Tooting, London, SW17 0QT.

Correspondence to Dr Jamie O'Driscoll, School of Human and Life Sciences, Canterbury Christ Church University, North Holmes Road, Canterbury, Kent, CT1 1 QU. Email: [jamie.odriscoll@canterbury.ac.uk](mailto:jamie.odriscoll@canterbury.ac.uk); Telephone: 01227782711.

## Supplementary File

Table S1: Adjusted status of extracted odds ratios

| Study Name                      | Adjusted status | Adjusted variables                                                                                                                                                                                                                 |
|---------------------------------|-----------------|------------------------------------------------------------------------------------------------------------------------------------------------------------------------------------------------------------------------------------|
| Aizer et al <sup>1</sup>        | Adjusted        | Age, treatment assignment (aspirin or placebo, -carotene or placebo), BMI, diabetes, hypertension, hyperlipidaemia, parental history of MI, alcohol, smoking, fish consumption, multivitamin, vitamin C, vitamin E, LVH, CHF, CVD. |
| Andersen et al <sup>2</sup>     | Adjusted        | Age, occupation, and education level.                                                                                                                                                                                              |
| Baldesberger et al <sup>3</sup> | Unadjusted      | N/A                                                                                                                                                                                                                                |
| Calvo et al <sup>4</sup>        | Unadjusted      | N/A                                                                                                                                                                                                                                |
| Claessen et al <sup>5</sup>     | Unadjusted      | N/A                                                                                                                                                                                                                                |
| Elosua et al <sup>6</sup>       | Adjusted        | Hypertension, age.                                                                                                                                                                                                                 |
| Karjalainen et al <sup>7</sup>  | Unadjusted      | N/A                                                                                                                                                                                                                                |
| Molina et al <sup>8</sup>       | Adjusted        | Age, systolic and diastolic blood pressure.                                                                                                                                                                                        |
| Mont et al <sup>9</sup>         | Unadjusted      | N/A                                                                                                                                                                                                                                |
| Myrstad et al <sup>10</sup>     | Adjusted        | CHD, hypertension, diabetes, age, height, BMI, education level, alcohol, smoking habits, leisure time physical activity.                                                                                                           |
| Myrstad et al <sup>11</sup>     | Adjusted        | Age, sex, BMI, concomitant CVD, stroke, diabetes, number of race participations.                                                                                                                                                   |
| Schreiner et al <sup>12</sup>   | Unadjusted      | N/A                                                                                                                                                                                                                                |
| Van Buuren et al <sup>13</sup>  | Unadjusted      | N/A                                                                                                                                                                                                                                |

Note: BMI, body mass index; MI, myocardial infarction; LVH, left ventricular hypertrophy; CHF, congestive heart failure; CVD, cardiovascular disease; CHD, coronary heart disease; N/A, not applicable.

Where ORs were not reported, they were calculated via the CMA in-built algorithm below:

- A = Developed AF Athletes
- B = Developed AF Controls
- C = Did Not Develop AF Athletes
- D = Did Not Develop AF Controls

$$\text{LogOddsRatio} = \text{Log}((A * D) / (B * C))$$

$$\text{LogOddsVariance} = (1 / A + 1 / B + 1 / C + 1 / D)$$

$$\text{LogOddsSE} = \text{Sqr}(\text{LogOddsVariance})$$

$$\text{OddsRatio} = \text{Exp}(\text{LogOddsRatio})$$

$$\text{LogOddsRatio} = \text{Log}((83 * 72) / (24 * 37)) = 1.907$$

$$\text{LogOddsVariance} = (1/83 + 1/24 + 1/37 + 1/72) = 0.095$$

$$\text{LogOddsSE} = \text{Sqr}(0.095) = 0.308$$

$$\text{OddsRatio} = \text{Exp}(1.907) = 6.730$$

Table S2: Meta-analysis output table displaying weightings, odds ratios, fixed and random effects.

| Study Name                      | Odds Ratio | Lower Limit | Upper Limit | Z Value | P value | Weight (random) |
|---------------------------------|------------|-------------|-------------|---------|---------|-----------------|
| Aizer et al <sup>1</sup>        | 1.200      | 1.021       | 1.411       | 2.207   | 0.027   | 12.976          |
| Andersen et al <sup>2</sup>     | 1.200      | 0.930       | 1.549       | 1.399   | 0.162   | 12.475          |
| Baldesberger et al <sup>3</sup> | 14.381     | 0.792       | 261.055     | 1.802   | 0.071   | 1.348           |
| Calvo et al <sup>4</sup>        | 3.880      | 1.548       | 9.723       | 2.893   | 0.004   | 7.046           |
| Claessen et al <sup>5</sup>     | 4.778      | 2.270       | 10.054      | 4.120   | 0.000   | 8.410           |
| Elosua et al <sup>6</sup>       | 3.100      | 1.376       | 6.984       | 2.730   | 0.006   | 7.854           |
| Karjalainen et al <sup>7</sup>  | 5.833      | 1.290       | 26.378      | 2.291   | 0.022   | 3.912           |
| Molina et al <sup>8</sup>       | 7.448      | 1.591       | 34.872      | 2.549   | 0.011   | 3.787           |
| Mont et al <sup>9</sup>         | 6.730      | 3.683       | 12.298      | 6.198   | 0.000   | 9.632           |
| Myrstad et al <sup>10</sup>     | 1.208      | 0.898       | 1.625       | 1.248   | 0.212   | 12.201          |
| Myrstad et al <sup>11</sup>     | 1.054      | 0.819       | 1.355       | 0.408   | 0.683   | 12.499          |
| Schreiner et al <sup>12</sup>   | 4.798      | 1.772       | 12.991      | 3.085   | 0.002   | 6.506           |
| Van Buuren et al <sup>13</sup>  | 21.894     | 1.213       | 395.094     | 2.091   | 0.037   | 1.353           |
| Random                          | 2.460      | 1.725       | 3.509       | 4.970   | 0.000   |                 |

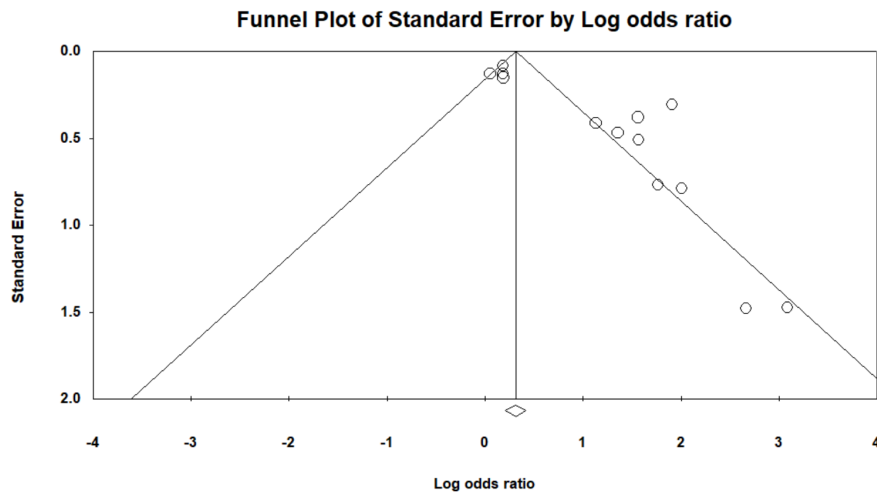

Figure S1: Study quality funnel plot with standard error vs logarithmic odds ratio.

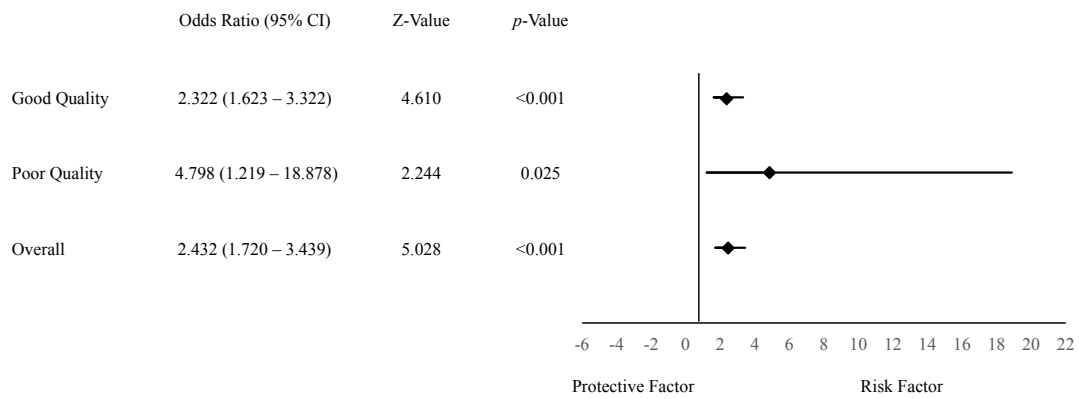

Figure S2: Subgroup analysis of study quality and the risk of atrial fibrillation.

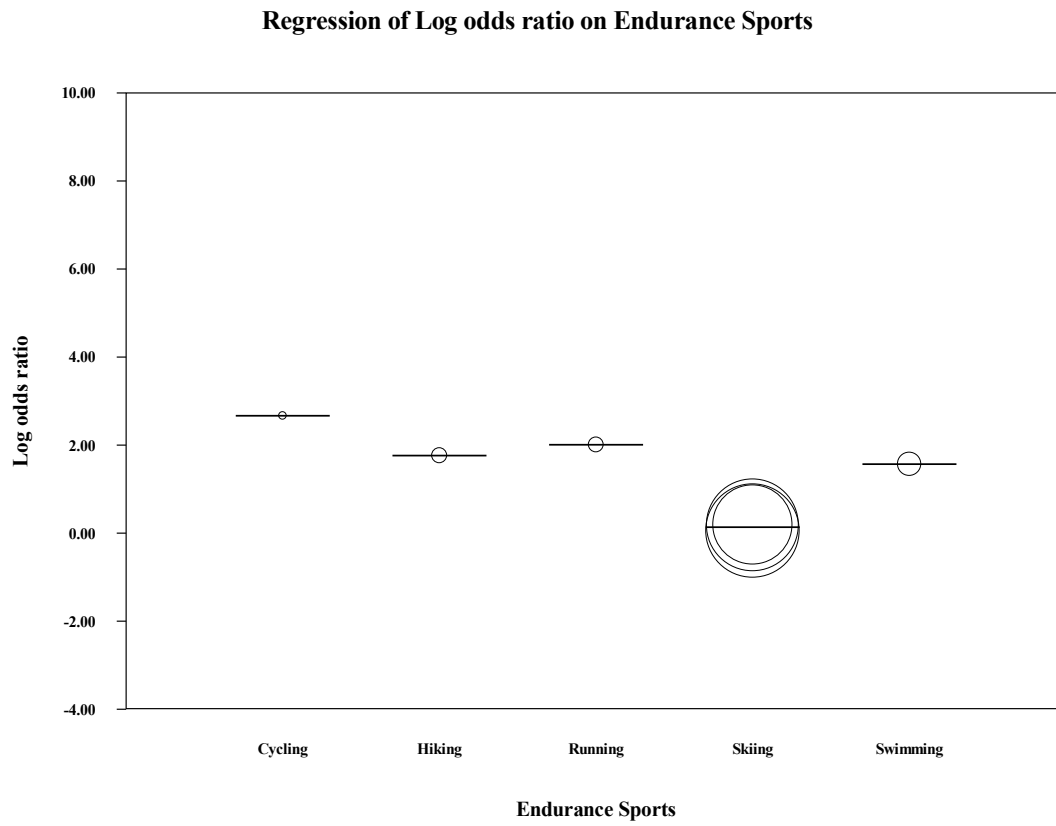

Figure S3: Endurance sport meta-regression bubble plot outputs.

## References

1. Aizer A, Gaziano JM, Cook NR, et al. Relation of vigorous exercise to risk of atrial fibrillation. *Am J Cardiol* 2009;103(11):1572-7.
2. Andersen K, Farahmand B, Ahlbom A, et al. Risk of arrhythmias in 52 755 long-distance cross-country skiers: a cohort study. *Eur Heart J* 2013;34(47):3624-31.
3. Baldesberger S, Bauersfeld U, Candinas R, et al. Sinus node disease and arrhythmias in the long-term follow-up of former professional cyclists. *Eur Heart J* 2008;29(1):71-8.
4. Calvo N, Ramos P, Montserrat S, et al. Emerging risk factors and the dose-response relationship between physical activity and lone atrial fibrillation: a prospective case-control study. *Europace* 2016;18(1):57-63.
5. Claessen G, Colyn E, La Gerche A, et al. Long-term endurance sport is a risk factor for development of lone atrial flutter. *Heart* 2011;97(11):918-22.
6. Elosua R, Arquer A, Mont L, et al. Sport practice and the risk of lone atrial fibrillation: a case-control study. *Int J Cardiol* 2006;108(3):332-7.
7. Karjalainen J, Kujala UM, Kaprio J, et al. Lone atrial fibrillation in vigorously exercising middle aged men: case-control study. *BMJ* 1998;316(7147):1784-5.
8. Molina L, Mont L, Marrugat J, et al. Long-term endurance sport practice increases the incidence of lone atrial fibrillation in men: a follow-up study. *Europace* 2008;10(5):618-23.
9. Mont L, Sambola A, Brugada J, et al. Long-lasting sport practice and lone atrial fibrillation. *Eur Heart J* 2002;23(6):477-82.
10. Myrstad M, Nystad W, Graff-Iversen S, et al. Effect of years of endurance exercise on risk of atrial fibrillation and atrial flutter. *Am J Cardiol* 2014;114(8):1229-33.
11. Myrstad M, Aaronaes M, Graff-Iversen S, et al. Physical activity, symptoms, medication and subjective health among veteran endurance athletes with atrial fibrillation. *Clin Res Cardiol* 2016;105(2):154-61.
12. Schreiner AD, Keith BA, Abernathy KE, et al. Long-Term, Competitive Swimming and the Association with Atrial Fibrillation. *Sports Med Open* 2016;2(1):42.
13. Van Buuren F, Mellwig KP, Faber L, et al. The occurrence of atrial fibrillation in former top-level handball players above the age of 50. *Acta Cardiol* 2012;67(2):213-20.
